# Supplementary material
Source: PubMed Central journal article supplement (PMC3430466)
Supplement: NIHMS270171-supplement-Supp1.pdf [file NIHMS270171-supplement-Supp1.pdf]

## Supplemental Figure

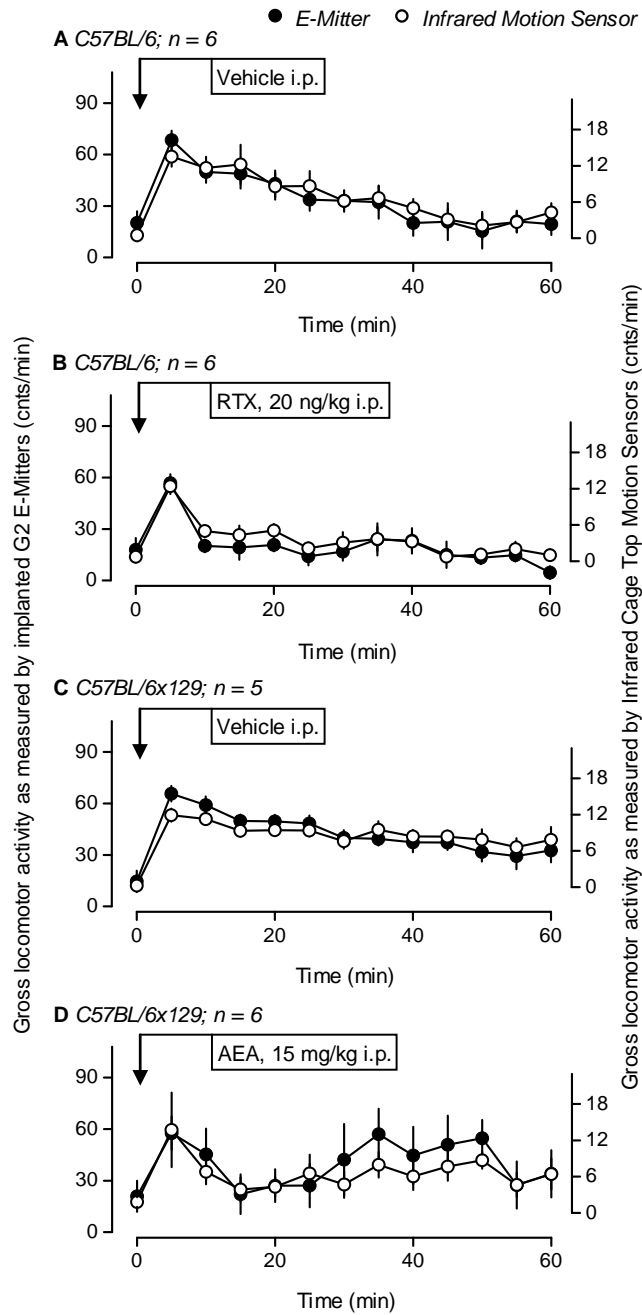

**Supplemental Figure 1.** Simultaneous measurements of gross locomotor activity by intraperitoneal telemetry probes and by external motion detectors. C57BL/6 (**A** and **B**) and C57BL/6x129 mice (**C** and **D**) were injected intraperitoneally with either resiniferatoxin (RTX, 20 ng/kg; **B**), anandamide (AEA, 15 mg/kg; **D**), or their vehicle (10% ethanol, 3.3 and 30 ml/kg; **A** and **C**, respectively). Locomotor activity was recorded simultaneously with G2 E-Mitter probes and Infrared Cage Top Motion Sensors (see Materials and Methods). In all experiments, the two methods produced nearly identical curves.
